# Supplementary material
Source: publisher site journal article supplement (https://www.dovepress.com/article/232595)

**Figure S1 Prognostic significance of MAGI2-AS3 and biological function of CADM2.** (A) Relation between MAGI2-AS3 level and overall survival of LUSC patients was analyzed by Kaplan-Meier analysis. (B) The venn pattern showed the target genes for miR-374a/b-5p based on the database of miRmap, microT, miRanda, and Pictar. (C) Quantification of colonies generated by SW900 and SK-MES-1 cells with CADM2 overexpression versus control. (D) Quantification of EdU positive cell ratio in SW900 and SK-MES-1 cells with CADM2 overexpression versus control. (E) Quantification of apoptotic ratio by flow cytometry analysis in SW900 and SK-MES-1 cells with CADM2 overexpression versus control. (F-G) Quantification of migrated and invaded cells in transwell assay in SW900 and SK-MES-1 cells with CADM2 overexpression versus control. **P< 0.01.


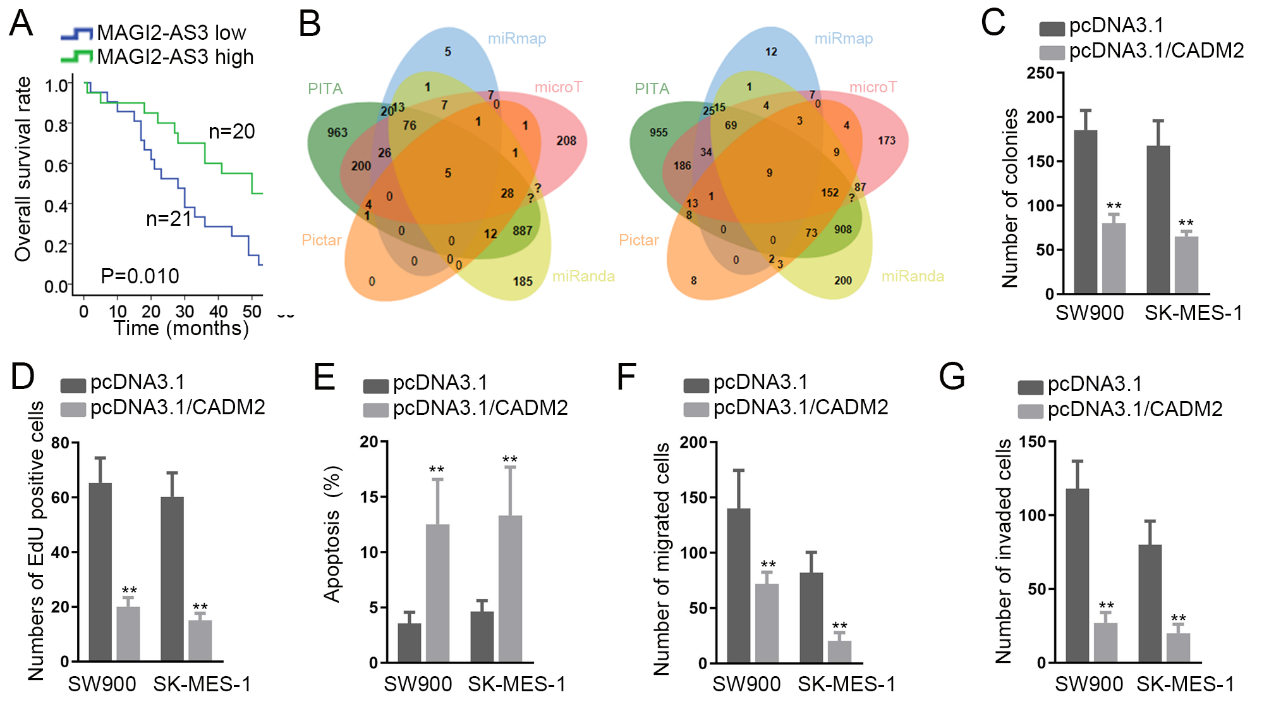


**Figure S2 Validation of MAGI2-AS3/miR-23a-3p/PTEN axis in LUSC cells.** (A-B) RT-qPCR analysis of SMG1 and PTEN expressions in LUSC samples versus the normal samples. (C) Pulldown assay confirmed the non-interaction of PTEN with miR-374a/b-5p. (D-E) RT-qPCR and western blot results of PTEN level in LUSC cells under overexpression of miR-374a/b-5p or MAGI2-AS3. (F-G) Pulldown and RIP assays confirmed the interaction of miR-23a-3p with PTEN and MAGI2-AS3. (H) Binding sites on PTEN for miR-23a-3p were obtained from TargetScan. Luciferase reporter assay confirmed that miR-23a-3p targeted PTEN at the predicted sites. **P< 0.01.


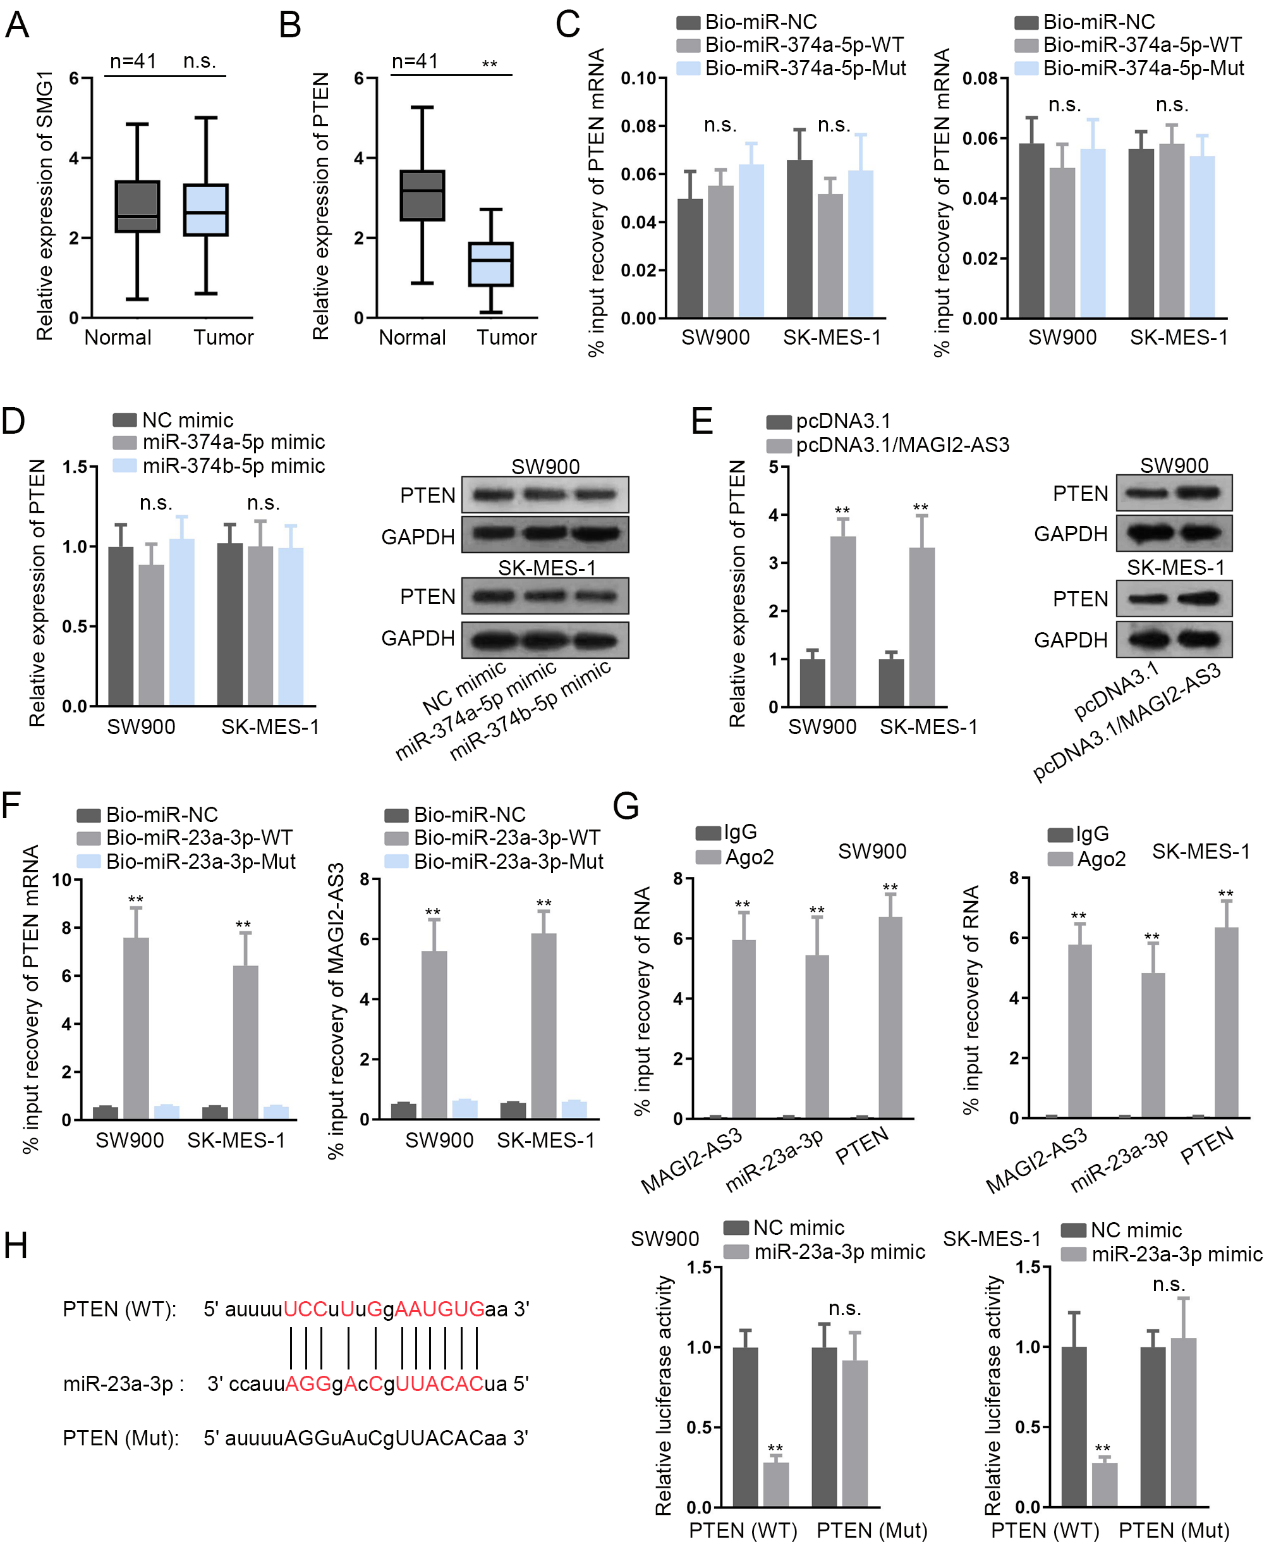


**Figure S3 Validation of the function of MAGI2-AS3/miR-23a-3p/PTEN axis in LUSC.** (A) RT-qPCR results of miR-23a-3p upregulation in LUSC tissues. (B) The expression correlations among miR-23a-3p, PTEN and MAGI2-AS3 in LUSC tissues by Spearman’s correlation curve. (C) SW900 and SK-MES-1 cells were transfected with pcDNA3.1, pcDNA3.1/MAGI2-AS3, pcDNA3.1/MAGI2-AS3+NC mimics, pcDNA3.1/MAGI2-AS3+miR-23a-3p mimics, or pcDNA3.1/MAGI2-AS3+miR-23a-3p mimics+pcDNA3.1/PTEN respectively. Western blot analysis of PTEN levels in indicated group. (D-E) Cell proliferation of SK-MES-1 cells was evaluated by colony formation and EdU in each group. (F) Apoptosis ratio was analyzed by flow cytometry analysis in SK-MES-1 cells of each group. (G-H) Migration and invasion of SK-MES-1 cells of each group was analyzed by Transwell assay. **P< 0.01.


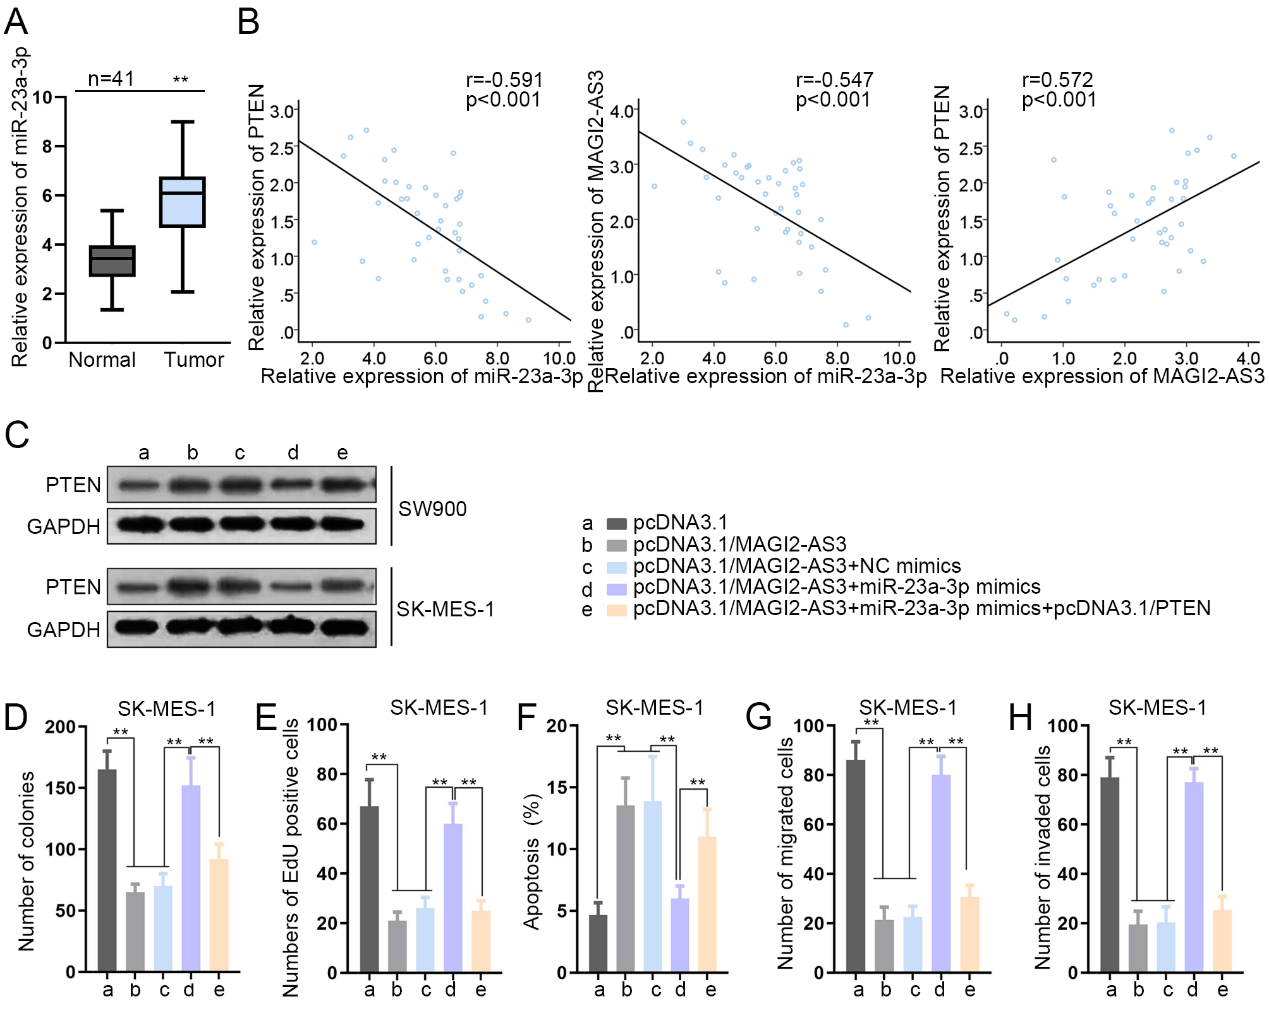

Supplement: Supplementary file 1 [file get_supplementary_file.php]
